# Supplementary material for: Eptinezumab Demonstrated Efficacy Regardless of Prior Preventive Migraine Treatment Failure Type: Post Hoc Analyses of the DELIVER Study
Source: Springer Nature journal article supplement (doi:10.1007/s40120-023-00575-5), 2024-01-18
Supplement: MOESM1 [file 26639750]

**Eptinezumab Demonstrated Efficacy Regardless of Prior Preventive Migraine Treatment  
Failure Type: Post Hoc Analyses of the DELIVER Study**

Patricia Pozo-Rosich<sup>1,2</sup>, Messoud Ashina<sup>3,4</sup>, Stewart J. Tepper<sup>5</sup>, Sidsel Jensen<sup>6</sup>, Line Pickering  
Boserup<sup>6</sup>, Mette Krog Josiassen<sup>6</sup>, Bjørn Sperling<sup>6</sup>

<sup>1</sup>*Headache Unit, Neurology Department, Hospital Universitari Vall d'Hebron, Barcelona, Spain*

<sup>2</sup>*Headache Research Group, Vall d'Hebron Institute of Research, Department of Medicine,  
Universitat Autònoma de Barcelona, Barcelona, Spain*

<sup>3</sup>*Department of Neurology, Danish Headache Center, Copenhagen University Hospital–  
Rigshospitalet, Copenhagen, Denmark*

<sup>4</sup>*Department of Clinical Medicine, University of Copenhagen, Copenhagen, Denmark*

<sup>5</sup>*New England Institute for Neurology and Headache, Stamford, Connecticut, United States*

<sup>6</sup>*H. Lundbeck A/S, Copenhagen, Denmark*

**Corresponding Author:**

Patricia Pozo-Rosich, MD, PhD  
Headache Unit and Research Group  
Vall d'Hebron University Hospital and Research Institute  
Universitat Autònoma de Barcelona  
Barcelona, Spain  
patricia.pozo@vhir.org

**Appendix 1****Table 1.** DELIVER Ethics Committees and Institutional Review Boards.

| <b>Country/Site</b> | <b>Central Ethics Committee or Institutional Review Board</b>                                                               |
|---------------------|-----------------------------------------------------------------------------------------------------------------------------|
| Belgium             | Ethics Committee Research UZ/KU Leuven<br>Leuven                                                                            |
| Bulgaria            | Republic of Bulgaria Ministry of Health, Ethics Committee for Clinical Trials<br>Sofia                                      |
| Czech Republic      | Ethics Committee of the Institute of Clinical and Experimental Medicine and<br>Thomayer Hospital<br>Prague                  |
| Denmark             | The Committees on Health Research Ethics for the Capital Region<br>Hovedstaden                                              |
| Finland             | National Committee on Medical Research Ethics<br>Helsinki                                                                   |
| France              | CPP South East VI<br>Clermont-Ferrand                                                                                       |
| Georgia             |                                                                                                                             |
| GE0001              | Local Ethics Committee of Ltd Aversi Clinic<br>Tbilisi                                                                      |
| GE0002              | Local Ethics Committee of Ltd Archangel St. Michael Multiprofile Clinical<br>Hospital<br>Tbilisi                            |
| GE0003              | Local Ethics Committee of Ltd Malkhaz Katsiashvili Multiprofile Emergency<br>Medicine Center<br>Tbilisi                     |
| GE0004              | Local Ethics Committee of Ltd Medi Club Georgia<br>Grodno                                                                   |
| GE0005              | Local Ethics Committee of Ltd Acad. Fridon Todua Medical Center – Ltd<br>Research Institute of Clinical Medicine<br>Tbilisi |
| GE0006              | Local Ethics Committee of Ltd Pineo Medical Ecosystem<br>Tbilisi                                                            |
| GE0007              | Local Ethics Committee of JSC Jerarsi<br>Tbilisi                                                                            |
| GE0008              | Local Ethics Committee was held at Ltd Multiprofile Clinic Consilium<br>Medulla<br>Tbilisi                                  |
| GE0009              | Local Ethics Committee of Ltd Simon Khechinashvili University Clinic<br>Tbilisi                                             |
| GE0010              | Local Ethics Committee of Ltd “Israel-Georgian Medical Research Clinic<br>Helsicore”<br>Tbilisi                             |
| Germany             | Ethics Committee at the State Medical Association in Hessen<br>Frankfurt                                                    |
| Hungary             | Medical Research Council, Ethics Committee for Clinical Pharmacology<br>Budapest                                            |

## Supplementary Materials

|                    |                                                                                                                                                                                                                                                   |
|--------------------|---------------------------------------------------------------------------------------------------------------------------------------------------------------------------------------------------------------------------------------------------|
| Italy              | IRCCS San Raffaele Roma Scientific Institute for Hospitalization and Healthcare Ethics Committee<br>Roma                                                                                                                                          |
| Poland             | Bioethics Committee at the District Medical Council of the Greater Poland Medical Chamber Poznan<br>Poznan                                                                                                                                        |
| Russian Federation |                                                                                                                                                                                                                                                   |
| RU0001             | Independent Interdisciplinary Committee on Ethical Expert Review for Clinical Studies<br>Moscow                                                                                                                                                   |
| RU0002             | MEDIS Local Ethics Committee<br>Nizhny Novgorod                                                                                                                                                                                                   |
| RU0003             | Local Ethics Committee at the Republican Clinical Neurology Centre<br>Kazan                                                                                                                                                                       |
| RU0004             | Local Ethics Committee at the Federal State Budgetary Educational Institution of Higher Education Kazan State Medical University of the Ministry of Health of the Russian Federation<br>Kazan                                                     |
| RU0005             | Local Ethics Committee No. 1 Central Clinical Hospital RZhD-Meditsina<br>Moscow                                                                                                                                                                   |
| RU0006             | Local Ethics Committee at the Federal State Budgetary Educational Institution of Higher Education Academician I.P. Pavlov First Saint Petersburg State Medical University of the Ministry of Health of the Russian Federation<br>Saint Petersburg |
| Slovakia           | Independent Ethics Committee of BBSK<br>Banská Bystrica                                                                                                                                                                                           |
| Spain              | Regional Drug Research Ethics Committee for the Community of Madrid<br>Madrid                                                                                                                                                                     |
| Sweden             | Swedish Ethical Review Authority<br>Uppsala                                                                                                                                                                                                       |
| United Kingdom     | North West – Haydock Research Ethics Committee<br>Manchester                                                                                                                                                                                      |
| United States      | Advarra IRB<br>Columbia, Maryland                                                                                                                                                                                                                 |
